# Supplementary material for: A R-loop sensing pathway mediates the relocation of transcribed genes to nuclear pore complexes
Source: PubMed Central journal article supplement (PMC10511428; doi:10.1038/s41467-023-41345-z), 2023-09-20
Supplement: 41467_2023_41345_MOESM1_ESM.pdf [file 41467_2023_41345_MOESM1_ESM.pdf]

## **Supplementary Information**

### **A R-loop sensing pathway mediates the relocation of transcribed genes to nuclear pore complexes**

Arianna Penzo, Marion Dubarry, Clémentine Brocas, Myriam Zheng, Raphaël M. Mangione, Mathieu Rougemaille, Coralie Goncalves, Ophélie Lautier, Domenico Libri, Marie-Noëlle Simon, Vincent Géli, Karine Dubrana & Benoit Palancade

Includes:

**Supplementary Figures 1-5**

**Supplementary Tables 1-4**

**Supplementary References**



Supplementary Figure 1. Validation of the gene datasets and reporter systems used to analyze the relationships between NPC association and R-loop levels. See legend on next page.

**Supplementary Figure 1. Validation of the gene datasets and reporter systems used to analyze the relationships between NPC association and R-loop levels.** **a-b**, Transcription rates (mRNA/hr)<sup>1</sup> for the genes associated with Nic96 peaks (this study), DNA:RNA hybrid peaks<sup>2</sup> or all protein-coding genes. The number of considered peaks is indicated. Outliers identified according to Tukey's definition are not represented on this scale but have been included in statistical analyses. Statistical test: two-sided Mann-Whitney-Wilcoxon test; \*\*\*\*,  $p < 10^{-4}$ . **c**, Transcription rates (mRNA/hr)<sup>1</sup>, transcript length (pre-mRNA, bp), AT-skew and GC-skew for the intronless and intron-containing highly-expressed genes as previously defined<sup>3</sup> (listed in Supplementary Table 1). Statistical test: two-sided Mann-Whitney-Wilcoxon test. **d-e**, R-loops levels for the same groups of intronless and intron-containing highly-expressed genes as scored by DNA:RNA hybrid immunoprecipitation (DRIP<sup>2</sup>; **d**), RNase H1 CRAC<sup>4</sup> (**e**, left panel) and RNase H2 CRAC<sup>4</sup> (**e**, right panel). Statistical test: two-sided Mann-Whitney-Wilcoxon test; \*\*\*\*,  $p < 10^{-4}$ . **f**, qPCR-based quantification of *YAT1* mRNA levels from *wt* or *tho* (*mft1Δ*) mutant cells grown in glycerol-lactate medium and further treated with either glucose (glu) or galactose (gal) for 5h (values normalized to *ACT1* RNA levels and relative to *wt*; mean±SD, n=3 independent experiments in glucose, 4 in galactose). Statistical test: two-sided Mann-Whitney-Wilcoxon test; \*,  $p = 2.86 \times 10^{-2}$ . **g**, Recombination frequencies (fraction of Leu+ prototrophs,  $\times 10^{-4}$ ; n refers to the number of biologically independent cultures assessed for each strain/condition) were calculated as described in Methods for *wt* or *tho* (*mft1Δ*) mutant cells carrying *YAT1* transgenes, grown in glycerol-lactate medium and further treated with either glucose (glu) or galactose (gal) for 5h. Boxes extend from the 25th to 75th percentiles, with the median displayed as a line. The whiskers mark the minimum and maximum, displaying as individual points the values that fall outside of 1.5 time the inter-quartile range of the first or third quartile (Tukey's definition). Statistical test: two-sided Mann-Whitney-Wilcoxon test; \*\*\*\*,  $p < 10^{-4}$ . **h**, Single channel images illustrating the principle of the zoning assay (*YAT1* tagged locus, Fig. 1g-h). Arrowheads point to loci localized in zone 1, and thus scored as peripheral. Note their colocalization with the Nup49-mCherry signal, even if not within the most prominent NPC patches. Scale bar = 1μm. Source data are provided as a Source Data file.



**Supplementary Figure 2. Characterization of R-loop formation and relocation for heat shock loci.** **a**, left panel, time-line of the heat shock and cell collection procedure used for DNA:RNA hybrid immunoprecipitation (DRIP) experiments. Right panel, DNA:RNA hybrid detection by DRIP-qPCR in *wt* cells grown at 25°C or heat-shocked at 37°C for 15min (% of IP; n=4 independent experiments). When indicated, DNA extracts were treated with RNase H *in vitro* prior to immunoprecipitation. Statistical test: two-sided Mann-Whitney-Wilcoxon test; \*, p=2.86 x 10<sup>-2</sup>. **b**, qPCR-based quantification of the amount of DNA from the indicated loci in heavy chromatin (HC) fractions from *wt* or *tho* (*mft1Δ*) mutant cells transformed with either an empty vector or the *tetOFF-scRNH1-Flag* construct (+scRNH1), and heat-shocked at 37°C for 15min (% of the indicated locus in P17K relative to total [S17K+P17K]; mean±SD, n=4 independent experiments or 3 for wt+scRNH1, relative to *wt*). Statistical test: two-sided Mann-Whitney-Wilcoxon test. **c**, Schematic representation of the time-line of the procedure and of the tagged genomic *HSP104* locus used for microscopy experiments. **d**, Fraction of G1 cells (%) showing *HSP104* in zone 1 (mean±SD, n=3 independent experiments), in the indicated strains grown at 25°C or heat shocked at 37°C for 15min. Statistical test: two-sided Fisher's exact test; P-values were calculated on the total number of counted cells (between 326 and 409 cells/condition); (a), p=1.59 x 10<sup>-2</sup>; (b), p=2.45 x 10<sup>-2</sup>; (c), p=4.96 x 10<sup>-7</sup>. Values are the same as in Fig. 3h. **e**, Representative images of the position of the tagged genomic *HSP104* locus (in green) in *nup133Δ* cells with respect to NPC clusters (visualized owing to the expression of the Nup49-mCherry nucleoporin). **f**, Fraction of G1 cells (%) showing colocalization of *HSP104* with the NPC clusters in *nup133Δ* cells grown at 25°C or heat-shocked at 37°C for 15min (mean±SD, n=3 independent experiments). Statistical test: two-sided Fisher's exact test; the P-value was calculated on the total number of counted cells (25°C: 100; 37°C: 112); \*\*\*\*, p=3.27 x 10<sup>-5</sup>. **g**, qPCR-based quantification of the amount of DNA from the indicated loci in heavy chromatin (HC) fractions from *GAL-YAT1* cells, either *wt* or *tho* (*mft1Δ*), grown in glycerol-lactate medium and further treated with either glucose (glu) or galactose (gal) for 5h (% of the indicated locus in P17K relative to total [S17K+P17K]; mean±SD, n=3 independent experiments in glucose or 4 in galactose, relative to *wt*). Statistical test: two-sided Mann-Whitney-Wilcoxon test; \*, p=2.86 x 10<sup>-2</sup>. Note that the co-fractionation phenotype is less pronounced for *YAT1* than for the HS genes, possibly in line with the particular high-frequency promoter firing in the latter case<sup>5</sup>. **h**, qPCR-based quantification of the amount of DNA from the indicated loci in heavy chromatin (HC) fractions from *wt* or *tho* (*mft1Δ*) mutant cells transformed with either an empty vector or the *GPD-hsRNH1* construct (+hsRNH1), and heat-shocked at 37°C for 15min (% of the indicated locus in P17K relative to total [S17K+P17K]; mean±SD, n=3 independent experiments, relative to *wt*). **i**, Nic96-myc enrichment was analyzed at the indicated loci by ChIP-qPCR in *wt* or *tho* (*mft1Δ*) mutant cells transformed with either an empty vector or the *GPD-hsRNH1* construct (+hsRNH1), and heat shocked at 37°C for 15min (% of immunoprecipitation; mean±SD, n=4 independent experiments). A strain expressing an untagged version of Nic96 (Nic96-myc: -) was used as a control. Statistical test: two-sided Mann-Whitney-Wilcoxon test; \*, p=2.86 x 10<sup>-2</sup>. Note that Nic96 ChIP signals observed over control or intergenic loci vary slightly in conditions of altered R-loop levels, albeit in a non-significant manner, likely reflecting their proximity with one of the multiple NPC contact sites scored in our ChIP-seq analysis (more than 1000 peaks over the genome, Fig. 2e). Source data are provided as a Source Data file.



**Supplementary Figure 3. Characterization of the R-loop gating pathway.** **a**, Heatmap analysis of RPA occupancy at the sense or antisense strand of highly-transcribed intronless and intron-containing genes, aligned at their Transcription Start Site (TSS) and Transcription End Site (TES), in *wt* cells arrested in G1 (strand-specific RPA ChIP-seq dataset)<sup>6</sup>. Only the regions between the TSS and the TES are scaled. Genes are grouped based on their intron content and ranked according to their R-loop levels (from Fig. 1c). Note that the position of RPA tracks does not perfectly correlate with the localization of R-loops (Fig. 1c), raising the possibility that RPA could also associate to genomic loci in G1, independently of R-loop formation. **b**, Average RPA occupancy at the sense or antisense strand of highly-transcribed intronless and intron-containing genes (normalized to input DNA). Statistical test: two-sided Mann-Whitney-Wilcoxon test; \*\*\*\*,  $p < 10^{-4}$ . **c**, Immunoprecipitation of R-loop-bound RPA is not expected to retrieve directional signals in strand-specific ChIP-seq. In the procedure used<sup>6</sup>, immunoprecipitated DNA is denatured and 3'-specific adaptors are ligated (red arrows) prior to library amplification. Since R-loops are expected to be smaller ( $\approx 150$ bps)<sup>7</sup> than sonicated DNA fragments (200-500bp), this treatment will similarly tail both strands with the adaptors. Source data are provided as a Source Data file.



Supplementary Figure 4. Control experiments related to SUMOylation, fractionation, growth and tethering assays. See legend on next page.

**Supplementary Figure 4. Control experiments related to SUMOylation, fractionation, growth and tethering assays.** **a-b**, biological replicates of the SUMOylation assay featured in Fig. 4a. Rfa1 is detected by western-blot in input fractions (bottom panel) or purified SUMO-conjugates (top panel) obtained from the indicated strains. Wild type (*ULP1*) or *ulp1-333* cells carrying the His-SMT3 (His-SUMO) construct were grown at 25°C or heat shocked at 37°C for 15min (heat-shock). The positions of unmodified and mono-SUMOylated Rfa1 are indicated, as well as molecular weights (kDa, kilodaltons). Dpm1 serves as a loading control. **c-d**, qPCR-based quantification of the amount of DNA from the indicated loci in heavy chromatin (HC) fractions from the indicated strains heat-shocked at 37°C for 15min (% of *HSP104* in P17K relative to total [S17K+P17K]; mean±SD, n=4 independent experiments, relative to wt). Statistical test: two-sided Mann-Whitney-Wilcoxon test. **e**, Serial dilutions of the indicated strains were grown at the indicated temperatures on rich medium (YPD). **f-h**, qPCR-based quantification of *HSP104* mRNA levels from the indicated strains grown at 25°C or heat-shocked at 37°C for 15min (values normalised to *ACT1* RNA levels and relative to wt; mean±SD, n=2-3 independent experiments for 25°C and 3-4 for 37°C). **i**, Fraction of cells (%) showing intronless *YAT1* in zone 1, in wt or *tho* (*mft1Δ*) mutant cells carrying either LexA- or LexA-Nup60-expressing constructs, grown in glycerol-lactate medium and further treated with glucose or galactose for 5h. Statistical test: two-sided Fisher's exact test; P-values were calculated on the total number of counted cells (between 141 and 270 cells/condition); (a),  $p=8.22 \times 10^{-3}$ ; (b),  $p=7.24 \times 10^{-6}$ ; (c),  $p=1.34 \times 10^{-3}$ ; (d),  $p=2.43 \times 10^{-2}$ ; (e),  $p<10^{-8}$ ; (f),  $p=2.18 \times 10^{-4}$ ; (g),  $p=5.95 \times 10^{-4}$ . Source data are provided as a Source Data file.



**Supplementary Figure 5. Proposed model for the relocation of R-loop forming loci to nuclear pore complexes.**

**Supplementary Table 1. Intronless and intron-containing highly-expressed genes considered in this study.**

| <b>Intronless (n=71)</b> |                      |                        |                      | <b>Intron-containing (n=80)</b> |                      |                        |                      |
|--------------------------|----------------------|------------------------|----------------------|---------------------------------|----------------------|------------------------|----------------------|
| <b>Systematic Name</b>   | <b>Standard Name</b> | <b>Systematic Name</b> | <b>Standard Name</b> | <b>Systematic Name</b>          | <b>Standard Name</b> | <b>Systematic Name</b> | <b>Standard Name</b> |
| YLR029C                  | RPL15A               | YGR192C                | TDH3                 | YGR034W                         | RPL26B               | YHL001W                | RPL14B               |
| YLR110C                  | CCW12                | YDR276C                | PMP3                 | YLR061W                         | RPL22A               | YNL302C                | RPS19B               |
| YJL158C                  | CIS3                 | YDR033W                | MRH1                 | YAL003W                         | EFB1                 | YOR182C                | RPS30B               |
| YLR044C                  | PDC1                 | YIL053W                | GPP1                 | YBL092W                         | RPL32                | YIL133C                | RPL16A               |
| YKL060C                  | FBA1                 | YML028W                | TSA1                 | YGL103W                         | RPL28                | YPR132W                | RPS23B               |
| YKL152C                  | GPM1                 | YHR193C                | EGD2                 | YNL112W                         | DBP2                 | YPL143W                | RPL33A               |
| YGL008C                  | PMA1                 | YNL031C                | HHT2                 | YGL030W                         | RPL30                | YML026C                | RPS18B               |
| YEL027W                  | VMA3                 | YDL055C                | PSA1                 | YDL130W                         | RPP1B                | YML024W                | RPS17A               |
| YNL145W                  | MFA2                 | YJR009C                | TDH2                 | YLR048W                         | RPS0B                | YDL083C                | RPS16B               |
| YLR249W                  | YEF3                 | YGR234W                | YHB1                 | YJL189W                         | RPL39                | YLR388W                | RPS29A               |
| YCR012W                  | PGK1                 | YEL009C                | GCN4                 | YPR043W                         | RPL43A               | YIL148W                | RPL40A               |
| YLR075W                  | RPL10                | YLR441C                | RPS1A                | YBR048W                         | RPS11B               | YJL177W                | RPL17B               |
| YDR382W                  | RPP2B                | YBL003C                | HTA2                 | YOL127W                         | RPL25                | YNL162W                | RPL42A               |
| YKL056C                  | TMA19                | YGL147C                | RPL9A                | YHR010W                         | RPL27A               | YOL120C                | RPL18A               |
| YOR063W                  | RPL3                 | YJL190C                | RPS22A               | YDL061C                         | RPS29B               | YLR406C                | RPL31B               |
| YPL131W                  | RPL5                 | YBR010W                | HHT1                 | YIL069C                         | RPS24B               | YIL052C                | RPL34B               |
| YAL038W                  | CDC19                | YDR134C                | CCW22                | YMR116C                         | ASC1                 | YOR096W                | RPS7A                |
| YJR123W                  | RPS5                 | YDR225W                | HTA1                 | YHR021C                         | RPS27B               | YDR447C                | RPS17B               |
| YHL015W                  | RPS20                | YDR418W                | RPL12B               | YGL031C                         | RPL24A               | YLR185W                | RPL37A               |
| YOL086C                  | ADH1                 | YGL253W                | HXK2                 | YDL075W                         | RPL31A               | YLR333C                | RPS25B               |
| YOL040C                  | RPS15                | YKL216W                | URA1                 | YML073C                         | RPL6A                | YKR094C                | RPL40B               |
| YDR050C                  | TPI1                 | YLR300W                | EXG1                 | YNL069C                         | RPL16B               | YDR064W                | RPS13                |
| YDR224C                  | HTB1                 | YLL045C                | RPL8B                | YIL018W                         | RPL2B                | YDL082W                | RPL13A               |
| YGL123W                  | RPS2                 | YNL030W                | HHF2                 | YJR145C                         | RPS4A                | YDR471W                | RPL27B               |
| YDR461W                  | MFA1                 | YDR155C                | CPR1                 | YDR500C                         | RPL37B               | YDR025W                | RPS11A               |
| YOR369C                  | RPS12                | YNL067W                | RPL9B                | YKR057W                         | RPS21A               | YLR448W                | RPL6B                |
| YLR167W                  | RPS31                | YLR264W                | RPS28B               | YBL087C                         | RPL23A               | YBR189W                | RPS9B                |
| YDL081C                  | RPP1A                | YDL192W                | ARF1                 | YGL189C                         | RPS26A               | YOR312C                | RPL20B               |
| YLR340W                  | RPP0                 | YEL054C                | RPL12A               | YBR191W                         | RPL21A               | YKL156W                | RPS27A               |
| YOR167C                  | RPS28A               | YGR037C                | ACB1                 | YPL079W                         | RPL21B               | YNL301C                | RPL18B               |
| YNL178W                  | RPS3                 | YPL037C                | EGD1                 | YGR118W                         | RPS23A               | YCR031C                | RPS14A               |
| YOL039W                  | RPP2A                | YHR089C                | GAR1                 | YGR148C                         | RPL24B               | YMR143W                | RPS16A               |
| YOL109W                  | ZEO1                 | YDL014W                | NOP1                 | YJL136C                         | RPS21B               | YBL027W                | RPL19B               |
| YHR174W                  | ENO2                 | YEL034W                | HYP2                 | YOR234C                         | RPL33B               | YHR141C                | RPL42B               |
| YGR060W                  | ERG25                | YBR106W                | SND3                 | YHR203C                         | RPS4B                | YER074W                | RPS24A               |
| YLR325C                  | RPL38                |                        |                      | YER117W                         | RPL23B               | YGR214W                | RPS0A                |
|                          |                      |                        |                      | YKL180W                         | RPL17A               | YNL096C                | RPS7B                |
|                          |                      |                        |                      | YOR293W                         | RPS10A               | YMR142C                | RPL13B               |
|                          |                      |                        |                      | YDR450W                         | RPS18A               | YLR344W                | RPL26A               |
|                          |                      |                        |                      | YOL121C                         | RPS19A               | YMR230W                | RPS10B               |

**Supplementary Table 2. Strains used in this study.**

| CODE    | NAME                    | GENOTYPE                                                                                                                                                          | USAGE (Fig.)                                          | SOURCE                                                                                                                                                                                                                                                            |
|---------|-------------------------|-------------------------------------------------------------------------------------------------------------------------------------------------------------------|-------------------------------------------------------|-------------------------------------------------------------------------------------------------------------------------------------------------------------------------------------------------------------------------------------------------------------------|
| YBP539  | <i>wt</i> (BY4742)      | MATalpha <i>ura3 his3 leu2 lys2</i>                                                                                                                               | Fig. 1b-d, 2a-e, S2a-b, S2h-i, 3c, 4g, S4c-f, S4h, 5a | Euroscarf                                                                                                                                                                                                                                                         |
| YBP936  | <i>wt</i> (BY4741)      | MATa <i>ura3 his3 leu2 met15</i>                                                                                                                                  | Fig. 3d                                               | Euroscarf                                                                                                                                                                                                                                                         |
| YBP1525 | <i>wt</i> (W303)        | MATalpha <i>ade2 ura3 his3 trp1 leu2 can1</i>                                                                                                                     | Fig. 3b, 4a, 4d-f, S4a-b, S4g, 5a                     | Gift from C. Dargemont.                                                                                                                                                                                                                                           |
| FSY3523 | <i>wt</i> (HSP104)      | (W303) <i>LacO@HSP104 3'::TRP1 ade2-1::GFP-LacI-ADE2 NUP49-GFP</i>                                                                                                | strain construction                                   | Rougemaille et al. <sup>8</sup>                                                                                                                                                                                                                                   |
| YKD2204 | <i>wt</i> (HSP104)      | (W303) <i>LacO@HSP104 3'::TRP1 ade2-1::GFP-LacI-ADE2 pRS316-NUP49-mCherry</i>                                                                                     | Fig. S2d, 3h, 4c                                      | Derived from FSY3523 through crosses.                                                                                                                                                                                                                             |
| FSY5216 | <i>wt</i> (GAL10)       | (W303) <i>LacO@GAL10 3'::TRP1 his3::LacI-GFP::HIS3 LexA-BS@GAL1 3' NUP49-GFP + pBTM116-URAr-LexA</i>                                                              | strain construction                                   | Texari et al. <sup>9</sup>                                                                                                                                                                                                                                        |
| YKD1683 | <i>wt</i> (GAL10)       | (W303) <i>LacO@GAL10 3'::TRP1 his3::LacI-GFP::HIS3 LexA-BS@GAL1 3' NUP49::NUP49-mCherry-HphMX</i>                                                                 | strain construction                                   | Derived from FSY5216 through crosses.                                                                                                                                                                                                                             |
| YBP2102 | <i>wt</i> (YAT1)        | (W303) <i>LacO@GAL10 3'::TRP1 his3::LacI-GFP::HIS3 LexA-BS@GAL1 3' NUP49::NUP49-mCherry-HphMX leu2Δ3'- GAL1<sub>prom</sub>-YAT1-leu2Δ5'::KanMX@GAL1 3'</i>        | Fig. 1h-i, S1f-h, S2g, 5c, S4i                        | Obtained by homologous recombination into YKD1683 using a cassette encompassing <i>leu2</i> repeats and the <i>YAT1</i> transgene, retrieved from pBP2057 by PacI-PmeI restriction and further integrated at <i>GAL1 3'</i> , upstream LexA-BS.                   |
| YBP2103 | <i>wt</i> (intron-YAT1) | (W303) <i>LacO@GAL10 3'::TRP1 his3::LacI-GFP::HIS3 LexA-BS@GAL1 3' NUP49::NUP49-mCherry-HphMX leu2Δ3'- GAL1<sub>prom</sub>-intron-YAT1-leu2Δ5'::KanMX@GAL1 3'</i> | Fig. 1i, S1f-g                                        | Obtained by homologous recombination into YKD1683 using a cassette encompassing <i>leu2</i> repeats and the intron-containing <i>YAT1</i> transgene, retrieved from pBP2060 by PacI-PmeI restriction and further integrated at <i>GAL1 3'</i> , upstream LexA-BS. |
| YBP1501 | <i>tho</i> (BY4742)     | (BY4742) <i>mft1::KanMX</i>                                                                                                                                       | Fig. 2c-e, S2b, S2h-i, 3c, 4g, S4c-f, S4h, 5a,        | Euroscarf                                                                                                                                                                                                                                                         |
| YBP2109 | <i>tho</i> (BY4741)     | (BY4741) <i>mft1::KanMX</i>                                                                                                                                       | Fig. 3d                                               | Euroscarf                                                                                                                                                                                                                                                         |
| YBP2006 | <i>tho</i> (W303)       | (W303) <i>mft1::KanMX</i>                                                                                                                                         | Fig. 4d-f, S4g, 5a                                    | The complete <i>MFT1</i> CDS was deleted by homologous recombination using a KanMX cassette amplified from pFA6a-KanMX6.                                                                                                                                          |
| YKD2373 | <i>tho</i> (HSP104)     | (YKD2204) <i>mft1::KanMX</i>                                                                                                                                      | Fig. S2d, 3h, 4c                                      | The complete <i>MFT1</i> CDS was deleted by homologous recombination using a KanMX cassette amplified from pFA6a-KanMX6.                                                                                                                                          |
| YKD2564 | <i>nup133</i> (HSP104)  | (YKD2204) <i>nup133::URA3</i>                                                                                                                                     | Fig. S2e-f                                            | The complete <i>NUP133</i> CDS was deleted by homologous recombination using a <i>nup133::URA3</i> cassette <sup>10</sup> .                                                                                                                                       |

|         |                                   |                                                                                                                                                                              |                              |                                                                                                                                                                                                                                                                                           |
|---------|-----------------------------------|------------------------------------------------------------------------------------------------------------------------------------------------------------------------------|------------------------------|-------------------------------------------------------------------------------------------------------------------------------------------------------------------------------------------------------------------------------------------------------------------------------------------|
| YBP2104 | <i>tho</i> ( <i>GAL10</i> )       | (YKD1683) <i>mft1::NatMX</i>                                                                                                                                                 | strain construction          | The complete <i>MFT1</i> CDS was deleted by homologous recombination using a <i>NatMX</i> cassette amplified from pFA6a- <i>NatMX6</i> .                                                                                                                                                  |
| YBP2105 | <i>tho</i> ( <i>YAT1</i> )        | (W303) <i>LacO@GAL10 3'::TRP1 his3::LacI-GFP::HIS3 LexA-BS@GAL1 3' NUP49::NUP49-mCherry-HphMX leu2Δ3'-GAL1<sub>prom</sub>-YAT1-leu2Δ5'::KanMX@GAL1 3' mft1::NatMX</i>        | Fig. 1i, S1f-g, S2g, 5c, S4i | Obtained by homologous recombination into YBP2104 using a cassette encompassing <i>leu2</i> repeats and the <i>YAT1</i> transgene, retrieved from pBP2057 by <i>PacI</i> - <i>PmeI</i> restriction and further integrated at <i>GAL1 3'</i> , upstream <i>LexA-BS</i> .                   |
| YBP2106 | <i>tho</i> ( <i>intron-YAT1</i> ) | (W303) <i>LacO@GAL10 3'::TRP1 his3::LacI-GFP::HIS3 LexA-BS@GAL1 3' NUP49::NUP49-mCherry-HphMX leu2Δ3'-GAL1<sub>prom</sub>-intron-YAT1-leu2Δ5'::KanMX@GAL1 3' mft1::NatMX</i> | Fig. 1i, S1f-g,              | Obtained by homologous recombination into YBP2104 using a cassette encompassing <i>leu2</i> repeats and the intron-containing <i>YAT1</i> transgene, retrieved from pBP2060 by <i>PacI</i> - <i>PmeI</i> restriction and further integrated at <i>GAL1 3'</i> , upstream <i>LexA-BS</i> . |
| YBP2307 | <i>NIC96-myc</i>                  | (BY4742) <i>NIC96-13Myc::KanMX</i>                                                                                                                                           | Fig. 1b-d, 2d-e, S2i, 3e-f   | C-terminal tagging of <i>Nic96</i> was achieved through the integration of a <i>13Myc-KanMX</i> cassette, amplified from pFA6a- <i>13Myc-KanMX6</i> , at the endogenous <i>NIC96</i> locus. <i>Nic96-myc</i> expression is driven by <i>NIC96</i> natural promoter.                       |
| YBP2308 | <i>tho NIC96-myc</i>              | (BY4742) <i>NIC96-13Myc::KanMX mft1::NatMX</i>                                                                                                                               | Fig. 2d-e; S2i, 3f           | The complete <i>MFT1</i> CDS was deleted by homologous recombination using a <i>NatMX</i> cassette amplified from pFA6a- <i>NatMX6</i> .                                                                                                                                                  |
| YBP2409 | <i>sac3Δ</i>                      | (W303) <i>sac3::KanMX</i>                                                                                                                                                    | Fig. 3b                      | The complete <i>SAC3</i> CDS was deleted by homologous recombination using a <i>KanMX</i> cassette amplified from pFA6a- <i>KanMX6</i> .                                                                                                                                                  |
| YBP2326 | <i>fcy1Δ</i>                      | (BY4742) <i>fcy1::KanMX</i>                                                                                                                                                  | strain construction          | Euroscarf                                                                                                                                                                                                                                                                                 |
| YBP2327 | <i>mlh3Δ</i>                      | (BY4742) <i>mlh3::KanMX</i>                                                                                                                                                  | strain construction          | Euroscarf                                                                                                                                                                                                                                                                                 |
| YBP2017 | <i>rad2Δ</i>                      | (BY4742) <i>rad2::KanMX</i>                                                                                                                                                  | strain construction          | Euroscarf                                                                                                                                                                                                                                                                                 |
| YBP2161 | <i>tho</i> (BY4741)               | (BY4741) <i>mft1::NatMX</i>                                                                                                                                                  | strain construction          | The complete <i>MFT1</i> CDS was deleted by homologous recombination using a <i>NatMX</i> cassette amplified from pFA6a- <i>NatMX6</i> .                                                                                                                                                  |
| YBP2332 | <i>tho fcy1Δ</i>                  | (BY4742) <i>fcy1::KanMX mft1::NatMX</i>                                                                                                                                      | Fig. 3c                      | Obtained by cross (YBP2326xYBP2161).                                                                                                                                                                                                                                                      |
| YBP2331 | <i>tho mlh3Δ</i>                  | (BY4742) <i>mlh3::KanMX mft1::NatMX</i>                                                                                                                                      | Fig. 3c                      | Obtained by cross (YBP2327xYBP2161).                                                                                                                                                                                                                                                      |
| YBP2018 | <i>tho rad2Δ</i>                  | (BY4742) <i>rad2::KanMX mft1::KanMX</i>                                                                                                                                      | Fig. 3c                      | Obtained by cross (YBP2017xYBP2161).                                                                                                                                                                                                                                                      |
| YBP2315 | <i>NIC96-myc rfa1-D228Y</i>       | (YBP2307) <i>rfa1-D228Y::NatMX</i>                                                                                                                                           | Fig. 3e-f                    | Obtained by homologous recombination into YBP2307 using a cassette encompassing the <i>RFA1</i> CDS carrying the D228Y mutation and the <i>NatMX</i> marker, retrieved from pBP2153 by <i>NotI</i> restriction and further integrated at the <i>RFA1</i> locus.                           |
| YBP2319 | <i>tho NIC96-myc rfa1-D228Y</i>   | (YBP2308) <i>rfa1-D228Y::NatMX</i>                                                                                                                                           | Fig. 3e-f                    | Obtained by cross (YBP2109xYBP2315).                                                                                                                                                                                                                                                      |
| YBP1478 | <i>siz1Δ siz2Δ</i>                | (BY4742) <i>siz1::KanMX siz2::KanMX</i>                                                                                                                                      | Fig. S4c, S4e                | Bretes et al. <sup>11</sup>                                                                                                                                                                                                                                                               |
| YBP2238 | <i>tho siz1Δ siz2Δ</i>            | (BY4742) <i>siz1::KanMX siz2::KanMX mft1::NatMX</i>                                                                                                                          | Fig. S4c, S4e                | Obtained by cross (YBP1478xYBP2161).                                                                                                                                                                                                                                                      |

|         |                                |                                                                                     |                     |                                                                                                                                                                                                                  |
|---------|--------------------------------|-------------------------------------------------------------------------------------|---------------------|------------------------------------------------------------------------------------------------------------------------------------------------------------------------------------------------------------------|
| YBP2277 | <i>slx5Δ</i>                   | (BY4742) <i>slx5::NatMX</i>                                                         | Fig. S4d            | The complete <i>SLX5</i> CDS was deleted by homologous recombination using a <i>NatMX</i> cassette amplified from pFA6a- <i>NatMX6</i> .                                                                         |
| YBP2237 | <i>tho slx5Δ</i>               | (BY4742) <i>slx5::NatMX mft1::KanMX</i>                                             | Fig. S4d            | Obtained by cross (YBP2277xYBP2109).                                                                                                                                                                             |
| YBP1167 | <i>slx8Δ</i>                   | (BY4742) <i>slx8::HphMX</i>                                                         | Fig. 4g, 5a, S4h    | The complete <i>SLX8</i> CDS was deleted by homologous recombination using a <i>HphMX</i> cassette amplified from pFA6a- <i>HphMX6</i> .                                                                         |
| YBP2166 | <i>tho slx8Δ</i>               | (BY4742) <i>slx8::HphMX mft1::NatMX</i>                                             | Fig. 4g, 5a, S4h    | Obtained by cross (YBP1167xYBP2161).                                                                                                                                                                             |
| YBP2324 | <i>rfa1-D228Y</i>              | (BY4742) <i>rfa1-D228Y</i>                                                          | Fig. 5a, S4f        | Obtained by cross (YBP2109xYBP2315).                                                                                                                                                                             |
| YBP2325 | <i>tho rfa1-D228Y</i>          | (BY4742) <i>rfa1-D228Y mft1::KanMX</i>                                              | Fig. 5a, S4f        | Obtained by cross (YBP2109xYBP2315).                                                                                                                                                                             |
| FSY3992 | <i>ulp1-333</i>                | (W303) <i>ULP1::HIS3 YCpLac22-ulp1-333-TRP1</i>                                     | Fig. 4a, S4a-b      | Infantino et al. <sup>12</sup>                                                                                                                                                                                   |
| Z417-17 | <i>rfa1-4KR</i>                | (W303) <i>rfa1- K170R, K180R, K411R, K427R mft1::KanMX</i>                          | Fig. 4f             | Dhingra et al. <sup>13</sup>                                                                                                                                                                                     |
| YBP2333 | <i>ulp1-333 rfa1-4KR</i>       | (W303) <i>rfa1- K170R, K180R, K411R, K427R; ULP1::KanMX; YCpLac11-LEU2-ulp1-333</i> | Fig. 4a             | The complete <i>ULP1</i> CDS was deleted by homologous recombination using a <i>KanMX</i> cassette (amplified from pFA6a- <i>KanMX6</i> ) into Z417-17 cells carrying the <i>YCpLac11-LEU2-ulp1-333</i> plasmid. |
| YBP2280 | <i>tho rfa1-4KR</i>            | (W303) <i>rfa1- K170R, K180R, K411R, K427R mft1::KanMX</i>                          | Fig. 4f             | The complete <i>MFT1</i> CDS was deleted by homologous recombination using a <i>KanMX</i> cassette amplified from pFA6a- <i>KanMX6</i> .                                                                         |
| T79-9   | <i>mms21-11</i>                | (W303) <i>mms21-11-LEU2</i>                                                         | Fig. 4d, 5a, S4g    | Gift from X. Zhao                                                                                                                                                                                                |
| YBP2278 | <i>tho mms21-11</i>            | (W303) <i>mms21-11-LEU2 mft1::KanMX</i>                                             | Fig. 4d, 5a, S4g    | Obtained by cross (T79-9x[ <i>mft1Δ</i> mat a W303]).                                                                                                                                                            |
| YBP2282 | <i>smt3-3KR</i>                | (W303) <i>smt3- K11R, K15R, K19R::TRP1</i>                                          | Fig. 4e             | Lescasse et al. <sup>14</sup>                                                                                                                                                                                    |
| YBP2290 | <i>tho smt3-3KR</i>            | (W303) <i>smt3- K11R, K15R, K19R::TRP1 mft1::KanMX</i>                              | Fig. 4e             | Obtained by cross (YBP2282x[ <i>mft1Δ</i> mat a W303]).                                                                                                                                                          |
| MNY1125 | <i>rfa1-D228Y</i>              | (W303) <i>rfa1-D228Y</i>                                                            | strain construction | Luciano et al. <sup>15</sup>                                                                                                                                                                                     |
| YKD2206 | <i>rfa1-D228Y (HSP104)</i>     | (YKD2204) <i>rfa1-D228Y</i>                                                         | Fig. 3h             | Derived from YKD2204 and MNY1125 by successive crosses.                                                                                                                                                          |
| YKD2338 | <i>tho rfa1-D228Y (HSP104)</i> | (YKD2204) <i>rfa1-D228Y mft1::KanMX</i>                                             | Fig. 3h             | The complete <i>MFT1</i> CDS was deleted by homologous recombination using a <i>KanMX</i> cassette amplified from pFA6a- <i>KanMX6</i> .                                                                         |
| YKD2426 | <i>rfa1-4KR (HSP104)</i>       | (YKD2204) <i>rfa1- K170R, K180R, K411R, K427R</i>                                   | Fig. 4c             | Derived from YKD2204 and Z417-17 by successive crosses.                                                                                                                                                          |
| YKD2463 | <i>tho rfa1-4KR (HSP104)</i>   | (YKD2204) <i>rfa1- K170R, K180R, K411R, K427R mft1::KanMX</i>                       | Fig. 4c             | The complete <i>MFT1</i> CDS was deleted by homologous recombination using a <i>KanMX</i> cassette amplified from pFA6a- <i>KanMX6</i> .                                                                         |
| YKD2372 | <i>mms21-11 (HSP104)</i>       | (YKD2204) <i>mms21-11::LEU2</i>                                                     | Fig. 4c             | Obtained from YKD2204 and T79-9 by successive crosses.                                                                                                                                                           |
| YKD2375 | <i>tho mms21-11 (HSP104)</i>   | (YKD2204) <i>mms21-11::LEU2 mft1::KanMX</i>                                         | Fig. 4c             | The complete <i>MFT1</i> CDS was deleted by homologous recombination using a <i>KanMX</i> cassette amplified from pFA6a- <i>KanMX6</i> .                                                                         |

**Supplementary Table 3. Plasmids used in this study.**

| CODE    | NAME                               | RELEVANT FEATURES                                                                  | SOURCE                        | USAGE (Fig.)        |
|---------|------------------------------------|------------------------------------------------------------------------------------|-------------------------------|---------------------|
| pBP414  | <i>pFA6a-KanMX6</i>                | AmpR; <i>TEF<sub>prom</sub>-KanMX6-TEF<sub>term</sub></i>                          | Longtine et al. <sup>16</sup> | Strain construction |
| pBP679  | <i>pFA6a-NatMX6</i>                | AmpR; <i>TEF<sub>prom</sub>-NatMX6-TEF<sub>term</sub></i>                          | Hentges et al. <sup>17</sup>  | Strain construction |
| pBP672  | <i>pFA6a-HphMX6</i>                | AmpR; <i>TEF<sub>prom</sub>-HphMX6-TEF<sub>term</sub></i>                          | Hentges et al. <sup>17</sup>  | Strain construction |
| pBP780  | <i>pFA6a-13Myc-KanMX6</i>          | AmpR; <i>13Myc-TEF<sub>prom</sub>-KanMX6-TEF<sub>term</sub></i>                    | Longtine et al. <sup>16</sup> | Strain construction |
| pBP1172 | <i>YCpLac11-LEU2-ulp1-333</i>      | AmpR/LEU2/CEN; <i>ULP1<sub>prom</sub>-ulp1-333</i>                                 | Bretes et al. <sup>11</sup>   | Strain construction |
| pBP2057 | <i>pFA6a-YAT1 *</i>                | AmpR; <i>GAL1 3'-leu2Δ3'-pGAL1-YAT1-leu2Δ5':KanMX-GAL1 3'</i>                      | This Study                    | Strain construction |
| pBP2060 | <i>pFA6a-intron-YAT1 *</i>         | AmpR; <i>GAL1 3'-leu2Δ3'-pGAL1-RPL51A*intron-YAT1-leu2Δ5':KanMX- GAL1 3'</i>       | This Study                    | Strain construction |
| pBP2153 | <i>pRS315-rfa1-D228Y-NatMX</i>     | AmpR/LEU2/CEN; <i>rfa1<sub>D228Y</sub>-NatMX6-RFA1 3'</i>                          | This Study                    | Strain construction |
| pBP2182 | <i>pRS315-TET-off scRNH1-Flag</i>  | AmpR/LEU2/CEN; <i>CMV<sub>prom</sub>-TetR-VP16, tetO<sub>7</sub>-scRNH1-3xFlag</i> | This study                    | Fig. 2a; S2b        |
| pBP1932 | <i>pRS423-GPD-hsRNH1</i>           | AmpR/HIS3/2μ; <i>GPD<sub>prom</sub>-myc-hsRNH1-CYC1<sub>term</sub></i>             | Bonnet et al. <sup>3</sup>    | Fig. 2c, S2h-i      |
| pBP1026 | <i>pRS316-NUP49-mCherry</i>        | AmpR/URA3/CEN; <i>NUP49<sub>prom</sub>-NUP49-mCherry</i>                           | Chadrin et al. <sup>18</sup>  | Fig. 3h, 4c, S2d-f  |
| pBP2155 | <i>pRS316-His<sub>6</sub>-SMT3</i> | AmpR/URA3/CEN; <i>SMT3<sub>prom</sub>-His6-SMT3-SMT3<sub>term</sub></i>            | This study                    | Fig. 4a, S4a-b      |
| pBP1882 | <i>pBTM116-URA-LexA</i>            | AmpR/URA3/2μ; <i>ADH1<sub>prom</sub>-LexA</i>                                      | Texari et al. <sup>9</sup>    | Fig. 5c, S4i        |
| pBP1883 | <i>pBTM116-URA-LexA-Nup60</i>      | AmpR/URA3/2μ; <i>ADH1<sub>prom</sub>-LexA-NUP60</i>                                | Texari et al. <sup>9</sup>    | Fig. 5c, S4i        |

\* *YAT1* reporter cassettes encompass: (i) a 100bp DNA fragment homologous to *GAL1 3'* (133-232bp downstream *GAL1* stop codon); (ii) the *leu2Δ3'-GAL1<sub>prom</sub>-YAT1-leu2Δ5'* or *leu2Δ3'-GAL1<sub>prom</sub>-RPL51A\*intron-YAT1-leu2Δ5'* reporter constructs, as previously defined<sup>3</sup>; (iii) the KanMX selection marker; (iv) a 100bp DNA fragment homologous to *GAL1 3'* (234-333bp downstream *GAL1* stop codon). Homologous recombination allows the integration of the cassette at *GAL1 3'* (233bp downstream the stop codon), upstream LexA binding sites (inserted 334bp downstream the stop codon in the FSY5216 parental strain<sup>9</sup>).

**Supplementary Table 4. Sequences of oligonucleotides used in this study.**

|                      |                          |
|----------------------|--------------------------|
| <i>HSP104 F</i>      | GTTCTACCAAATCACGAAGC     |
| <i>HSP104 R</i>      | TCTAGGTCATCATCAATTTCC    |
| <i>YEF3 F</i>        | GATTGCCGGTGGTAAGAAGA     |
| <i>YEF3 R</i>        | CGTAAGCATCACCCAATTCC     |
| <i>Intergenic* F</i> | GAAACCACGAAAAGTTCACCA    |
| <i>Intergenic* R</i> | AGCTTCTGCAAACCTCATTG     |
| <i>YAT1 F</i>        | TCTGTGGTGGTGCCTCAAG      |
| <i>YAT1 R</i>        | CTTGCTGCCGTTTGAAGATG     |
| <i>ACT1 F</i>        | ACGTTACCCAATTGAACACG     |
| <i>ACT1 R</i>        | AGAACAGGGTGTTCTTCTGG     |
| <i>GSY2 F</i>        | ATGACCCCTGGTGATTTGGG     |
| <i>GSY2 R</i>        | TCAGCATATGGGCCATCGTC     |
| <i>PAU17 F</i>       | CCCCGCTGACCAAGTCACTA     |
| <i>PAU17 R</i>       | AGCAGTGTAGATACCGTCTGC    |
| <i>SSA4 F</i>        | TGGAATCCATTGCTTACTCTTTGA |
| <i>SSA4 R</i>        | AGCCTTCTTAGTGACAGCGT     |

\* chrIV:43199..53262

## Supplementary References

1. Pelechano, V., Chávez, S. & Pérez-Ortín, J. E. A complete set of nascent transcription rates for yeast genes. *PLoS One* **5**, e15442 (2010).
2. Wahba, L., Costantino, L., Tan, F. J., Zimmer, A. & Koshland, D. S1-DRIP-seq identifies high expression and polyA tracts as major contributors to R-loop formation. *Genes Dev.* **30**, 1327–1338 (2016).
3. Bonnet, A. *et al.* Introns Protect Eukaryotic Genomes from Transcription-Associated Genetic Instability. *Mol. Cell* **67**, 608–621.e6 (2017).
4. Aiello, U. *et al.* Sen1 is a key regulator of transcription-driven conflicts. *Mol. Cell* **85**, 2765(22)00604–9 (2022) doi:10.1016/j.molcel.2022.06.021.
5. Mouaikel, J. *et al.* High-frequency promoter firing links THO complex function to heavy chromatin formation. *Cell Rep.* **5**, 1082–1094 (2013).
6. Reuswig, K.-U. *et al.* Unscheduled DNA replication in G1 causes genome instability and damage signatures indicative of replication collisions. *Nat. Commun.* **13**, 7014 (2022).
7. García-Pichardo, D. *et al.* Histone Mutants Separate R Loop Formation from Genome Instability Induction. *Mol. Cell* **66**, 597–609.e5 (2017).
8. Rougemaille, M. *et al.* THO/Sub2p Functions to Coordinate 3'-End Processing with Gene-Nuclear Pore Association. *Cell* **135**, 308–321 (2008).
9. Texari, L. *et al.* The Nuclear Pore Regulates GAL1 Gene Transcription by Controlling the Localization of the SUMO Protease Ulp1. *Mol. Cell* **51**, 807–818 (2013).
10. Belgareh, N. & Doye, V. Dynamics of nuclear pore distribution in nucleoporin mutant yeast cells. *J. Cell Biol.* **136**, 747–759 (1997).
11. Bretes, H. *et al.* Sumoylation of the THO complex regulates the biogenesis of a subset of mRNPs. *Nucleic Acids Res.* **42**, 5043–5058 (2014).
12. Infantino, V. *et al.* The mRNA export adaptor Yra1 contributes to DNA double-strand break repair through its C-box domain. *PLoS One* **14**, e0206336 (2019).
13. Dhingra, N., Wei, L. & Zhao, X. Replication protein A (RPA) sumoylation positively influences the DNA damage checkpoint response in yeast. *J. Biol. Chem.* **294**, 2690–2699 (2019).

14. Lescasse, R., Pobiega, S., Callebaut, I. & Marcand, S. End-joining inhibition at telomeres requires the translocase and polySUMO-dependent ubiquitin ligase Uls1. *EMBO J.* **32**, 805–815 (2013).
15. Luciano, P. *et al.* RPA facilitates telomerase activity at chromosome ends in budding and fission yeasts. *EMBO J.* **31**, 2034–2046 (2012).
16. Longtine, M. S. *et al.* Additional modules for versatile and economical PCR-based gene deletion and modification in *Saccharomyces cerevisiae*. *Yeast Chichester Engl.* **14**, 953–961 (1998).
17. Hentges, P., Van Driessche, B., Tafforeau, L., Vandenhaute, J. & Carr, A. M. Three novel antibiotic marker cassettes for gene disruption and marker switching in *Schizosaccharomyces pombe*. *Yeast Chichester Engl.* **22**, 1013–1019 (2005).
18. Chadrin, A. *et al.* Pom33, a novel transmembrane nucleoporin required for proper nuclear pore complex distribution. *J. Cell Biol.* **189**, 795–811 (2010).
